# Supplementary material
Source: PubMed Central journal article supplement (PMC4620535)
Supplement: Supp_Fig1.pdf [file Supp_Fig1.pdf]

## Supplementary Data

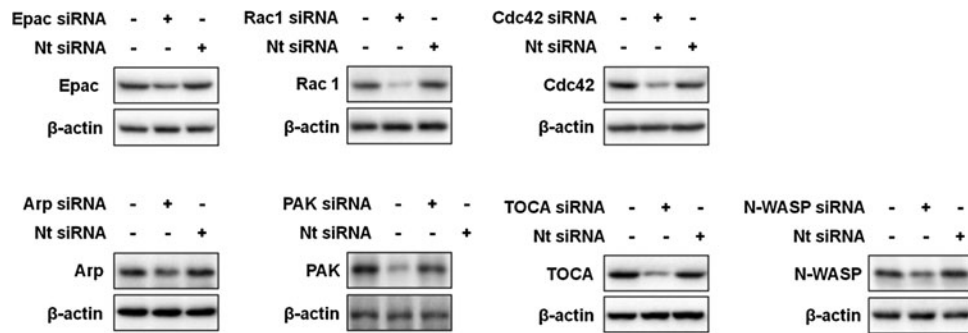

**SUPPLEMENTARY FIG. S1.** Small interfering RNA (siRNA) efficacy used in the present study. Mouse embryonic stem cells were transfected with Epac, Rac1, CDC42, Arp, PAK, TOCA, and N-WASP siRNA for 6 h and then the culture media were replaced with transfection mixture-free and serum-free media. The cells were harvested at 24 h from initial transfection time. Each target protein of siRNA was detected with western blot analysis, respectively.
